# Supplementary material for: 100 years of inherited metabolic disorders in Austria—A national registry of minimal birth prevalence, diagnosis, and clinical outcome of inborn errors of metabolism in Austria between 1921 and 2021
Source: PubMed Central journal article supplement — J Inherit Metab Dis. 2021 Oct 17;45(2):144–56. doi: 10.1002/jimd.12442 (PMC9297958; doi:10.1002/jimd.12442), 2021-10-17
Supplement: JIMD-45-144-s004.pdf [file JIMD-45-144-s004.pdf]

## Anhang: Inzidenz von angeborenen Stoffwechselstörungen in Österreich

### SSIEM classification of Inborn Errors of Metabolism 2011

| <i>Disease group / disease</i>                                                                           | ICD10 | OMIM   |
|----------------------------------------------------------------------------------------------------------|-------|--------|
| <b>1. Disorders of amino acid and peptide metabolism</b>                                                 |       |        |
| <b>1.1. Urea cycle disorders and inherited hyperammonaemias</b>                                          |       |        |
| 1.1.1. Carbamoylphosphate synthetase I deficiency                                                        |       | 237300 |
| 1.1.2. N-Acetylglutamate synthetase deficiency                                                           |       | 237310 |
| 1.1.3. Ornithine transcarbamylase deficiency                                                             |       | 311250 |
| S Ornithine carbamoyltransferase deficiency                                                              |       |        |
| 1.1.4. Citrullinaemia type1                                                                              |       | 215700 |
| S Argininosuccinate synthetase deficiency                                                                |       |        |
| 1.1.5. Argininosuccinic aciduria                                                                         |       | 207900 |
| S Argininosuccinate lyase deficiency                                                                     |       |        |
| 1.1.6. Argininaemia                                                                                      |       | 207800 |
| S Arginase I deficiency                                                                                  |       |        |
| 1.1.7. HHH syndrome                                                                                      |       | 238970 |
| S Hyperammonaemia-hyperornithinaemia-homocitrullinuria syndrome                                          |       |        |
| S Mitochondrial ornithine transporter (ORNT1) deficiency                                                 |       |        |
| 1.1.8. Citrullinemia Type 2                                                                              |       | 603859 |
| S Aspartate glutamate carrier deficiency ( SLC25A13)                                                     |       |        |
| S Citrin deficiency                                                                                      |       |        |
| 1.1.9. Hyperinsulinemic hypoglycemia and hyperammonemia caused by activating mutations in the GLUD1 gene |       | 138130 |
| 1.1.10. Other disorders of the urea cycle                                                                |       | 238970 |
| 1.1.11. Unspecified hyperammonaemia                                                                      |       | 238970 |
| <b>1.2. Organic acidurias</b>                                                                            |       |        |
| 1.2.1. Glutaric aciduria                                                                                 |       |        |
| 1.2.1.1. Glutaric aciduria type I                                                                        |       | 231670 |
| S Glutaryl-CoA dehydrogenase deficiency                                                                  |       |        |
| 1.2.1.2. Glutaric aciduria type III                                                                      |       | 231690 |
| 1.2.2. Propionic aciduria                                                                                | E711  | 232000 |
| S Propionyl-CoA-Carboxylase deficiency                                                                   |       |        |
| 1.2.3. Methylmalonic aciduria                                                                            | E711  | 251000 |
| 1.2.3.1. Methylmalonyl-CoA mutase deficiency                                                             |       |        |
| 1.2.3.2. Methylmalonyl-CoA epimerase deficiency                                                          |       | 251120 |
| 1.2.3.3. Methylmalonic aciduria, unspecified                                                             |       |        |
| 1.2.4. Isovaleric aciduria                                                                               | E711  | 243500 |
| S Isovaleryl-CoA dehydrogenase deficiency                                                                |       |        |
| 1.2.5. Methylcrotonylglycinuria                                                                          | E744  | 210200 |
| S Methylcrotonyl-CoA carboxylase deficiency                                                              |       |        |
| 1.2.6. Methylglutaconic aciduria                                                                         | E712  | 250950 |
| 1.2.6.1. Methylglutaconic aciduria type I                                                                | E712  | 250950 |
| S 3-Methylglutaconyl-CoA hydratase deficiency                                                            |       |        |
| 1.2.6.2. Methylglutaconic aciduria type II                                                               | E723  | 302060 |
| S Barth syndrome                                                                                         |       |        |
| S Taffazin deficiency                                                                                    |       |        |
| 1.2.6.3. Methylglutaconic aciduria type III                                                              | E723  | 258501 |
| S Costeff syndrome                                                                                       |       |        |
| 1.2.6.4. Methylglutaconic aciduria type IV                                                               | E723  | 250951 |
| 1.2.6.5. Methylglutaconic aciduria type V                                                                |       | 610198 |

|             |                                                                                                      |      |        |
|-------------|------------------------------------------------------------------------------------------------------|------|--------|
| 1.2.7.      | 3-Hydroxy-3-methylglutaric aciduria                                                                  | E728 | 246450 |
|             | S 3-Hydroxy-3-methylglutaryl-CoA lyase deficiency                                                    |      |        |
| 1.2.8.      | 2-Methylbutyric aciduria                                                                             |      | 610006 |
|             | S 2-Methylbutyryl-CoA dehydrogenase deficiency                                                       |      |        |
| 1.2.9.      | 2-Methyl-3-hydroxybutyric aciduria                                                                   |      | 300438 |
|             | S 17-beta-hydroxysteroid dehydrogenase type 10 deficiency                                            |      |        |
|             | S HSD10 deficiency                                                                                   |      |        |
|             | S 2-Methyl-3-hydroxybutyryl-CoA dehydrogenase deficiency                                             |      |        |
| 1.2.10.     | Alpha-methylacetoacetic aciduria                                                                     | E712 | 203750 |
|             | S Beta-ketothiolase deficiency                                                                       |      |        |
|             | S Mitochondrial acetoacetyl-CoA thiolase deficiency                                                  |      |        |
|             | S 3-Oxothiolase deficiency                                                                           |      |        |
| 1.2.11.     | Isobutyric aciduria                                                                                  |      | 611283 |
|             | S Isobutyryl-CoA dehydrogenase deficiency                                                            |      |        |
| 1.2.12.     | Methacrylic aciduria                                                                                 | E711 | 250620 |
|             | S 3-Hydroxyisobutyryl-CoA deacylase deficiency                                                       |      |        |
| 1.2.13.     | 3-Hydroxyisobutyric aciduria                                                                         |      | 236795 |
|             | S 3-Hydroxyisobutyrate dehydrogenase                                                                 |      |        |
| 1.2.14.     | Methylmalonate semialdehyde dehydrogenase deficiency                                                 |      | 603178 |
| 1.2.15.     | L-2-hydroxyglutaric aciduria                                                                         |      | 236792 |
|             | S L-2-hydroxyglutarate dehydrogenase defect                                                          |      |        |
| 1.2.16.     | D-2-hydroxyglutaric aciduria                                                                         |      | 600721 |
| 1.2.16.1.   | D-2-hydroxyglutarate dehydrogenase deficiency                                                        |      | 609186 |
| 1.2.16.2.   | Mitochondrial isocitrate dehydrogenase deficiency                                                    |      | 147650 |
| 1.2.17.     | Aminoacylase deficiency                                                                              |      |        |
| 1.2.17.1.   | Aminoacylase 1 deficiency                                                                            |      | 609924 |
| 1.2.17.2.   | Aminoacylase 2 deficiency                                                                            |      | 271900 |
|             | S Aspartoacylase deficiency                                                                          |      |        |
|             | S Canavan disease                                                                                    |      |        |
|             | S van Bogaert-Bertrand disease                                                                       |      |        |
| 1.2.18.     | Methylmalonate semialdehyde dehydrogenase deficiency                                                 |      | 603178 |
| 1.2.19.     | Other organic acidurias                                                                              |      |        |
| <b>1.3.</b> | <b>Disorders of the metabolism of branched-chain amino acids not classified as organic acidurias</b> |      |        |
| 1.3.1.      | Branched-chain amino acid transferase                                                                |      | 238340 |
| 1.3.2.      | Maple syrup urine disease                                                                            | E710 | 248600 |
|             | S Branched-chain alpha-keto acid dehydrogenase complex deficiency                                    | E710 | 248600 |
|             | S BCKD deficiency                                                                                    | E710 | 248600 |
| 1.3.2.1.    | BCKD E1 alpha subunit of deficiency                                                                  |      |        |
|             | S Maple syrup urine disease type Ia                                                                  |      |        |
| 1.3.2.2.    | BCKD E1 beta subunit of deficiency                                                                   |      |        |
|             | S Maple syrup urine disease type Ib                                                                  |      |        |
| 1.3.2.3.    | Dihydrolipoamide branched chain transacylase deficiency                                              |      | 248610 |
|             | S Maple syrup urine disease type II                                                                  |      | 248610 |
|             | S E2 deficiency                                                                                      |      | 248610 |
| 1.3.2.4.    | Unspecified BCKD deficiency                                                                          |      | 248610 |
| 1.3.3.      | Other disorders of branched-chain amino acid metabolism                                              |      |        |
| <b>1.4.</b> | <b>Disorders of phenylalanine or tyrosine metabolism</b>                                             |      |        |
| 1.4.1.      | Phenylalanine hydroxylase deficiency                                                                 |      | 261600 |
|             | S Phenylketonuria                                                                                    |      |        |
|             | S Mild Hyperphenylalaninaemia                                                                        |      |        |
| 1.4.2.      | Tyrosinaemia type II                                                                                 |      | 276600 |
|             | S Tyrosine aminotransferase deficiency                                                               |      |        |
| 1.4.3.      | Tyrosinaemia type III                                                                                |      | 276710 |

|             |                                                                                                        |      |        |
|-------------|--------------------------------------------------------------------------------------------------------|------|--------|
|             | S 4-hydroxyphenylpyruvate dioxygenase deficiency                                                       |      |        |
| 1.4.4.      | Hawkinsinuria                                                                                          |      | 140350 |
|             | S 4-Hydroxyphenylpyruvate hydroxylase deficiency                                                       |      |        |
| 1.4.5.      | Alkaptonuria                                                                                           |      | 203500 |
|             | S Homogentisate 1,2 - dioxygenase deficiency                                                           |      |        |
| 1.4.6.      | Tyrosinaemia type I                                                                                    |      | 276700 |
|             | S Fumarylacetoacetase deficiency                                                                       |      |        |
| 1.4.7.      | Transient tyrosinaemia of the neonate                                                                  |      |        |
| 1.4.8.      | Other disorders of phenylalanine or tyrosine metabolism                                                |      |        |
| <b>1.5.</b> | <b>Disorders of the metabolism of sulphur amino acids</b>                                              |      |        |
| 1.5.1.      | Methionine adenosyltransferase I/III deficiency                                                        | E721 | 250850 |
|             | S MAT deficiency                                                                                       |      |        |
|             | S MAT I/III deficiency                                                                                 |      |        |
|             | S Hypermethioninemia, Isolated persistent                                                              |      |        |
| 1.5.2.      | Glycine N-methyltransferase deficiency                                                                 | E728 | 606664 |
|             | S GNMT deficiency                                                                                      |      |        |
| 1.5.3.      | S-adenosylhomocysteine hydrolase deficiency                                                            | E721 | 180960 |
|             | S AHCY                                                                                                 |      |        |
|             | S SAHH                                                                                                 |      |        |
|             | S Hypermethioninemia with deficiency of S-adenosylhomocysteine hydrolase                               |      |        |
| 1.5.4.      | Cystathionine beta-synthase deficiency                                                                 | E721 | 263200 |
|             | S Homocystinuria                                                                                       |      |        |
|             | S CBS deficiency                                                                                       |      |        |
| 1.5.5.      | Cystathionase deficiency                                                                               | E721 | 219500 |
|             | S Cystathione gamma - lyase deficiency                                                                 |      |        |
|             | S Gamma - cystathionase deficiency                                                                     |      |        |
|             | S Cystathioninuria                                                                                     |      |        |
| 1.5.6.      | Isolated sulfite oxidase deficiency                                                                    | E721 | 272300 |
|             | S Sulphite oxidase deficiency                                                                          |      |        |
|             | S Sulphocysteinuria                                                                                    |      |        |
| 1.5.7.      | Methionine synthase deficiency-cblG                                                                    | E721 | 250940 |
|             | S Methylcobalamin deficiency, cblG type                                                                |      |        |
|             | S Homocystinuria-megaloblastic anemia due to defect in cobalamin metabolism, cblG complementation type |      |        |
| 1.5.8.      | Methionine synthase reductase deficiency-cblE                                                          | E721 | 236270 |
|             | S Homocystinuria-megaloblastic anemia due to defect in cobalamin metabolism, cblE complementation type |      |        |
|             | S Vitamin B12-responsive homocystinuria, cblE type                                                     |      |        |
|             | S Methylcobalamin deficiency, cblE type                                                                |      |        |
| 1.5.9.      | Other genetic defect in methionine cycle or sulfur amino acid metabolism                               | E721 |        |
| 1.5.10.     | Unspecified disorder of homocysteine metabolism                                                        | E721 |        |
| 1.5.11.     | Unspecified disorder of methionine metabolism                                                          | E721 |        |
| 1.5.12.     | Secondary non-genetic disorders of methionine cycle and other sulfur amino acids                       | E729 |        |
| <b>1.6.</b> | <b>Disorders of histidine, tryptophan or lysine metabolism</b>                                         |      |        |
| 1.6.1.      | Histidinaemia                                                                                          | E708 | 235800 |
|             | S Histidase deficiency                                                                                 |      |        |
| 1.6.2.      | Urocanase deficiency                                                                                   | E708 | 276880 |
| 1.6.3.      | Glutamate formiminotransferase deficiency                                                              | E728 | 229100 |
|             | S Forminotransferase deficiency                                                                        |      |        |
|             | S Forminoglutamic aciduria                                                                             |      |        |
|             | S Figlu-uria                                                                                           | E728 | 229100 |
| 1.6.4.      | Tryptophanaemia                                                                                        | E708 |        |
|             | S Tryptophan-2,3-Dioxygenase deficiency                                                                |      |        |

|                                                                  |                                                        |      |        |
|------------------------------------------------------------------|--------------------------------------------------------|------|--------|
| 1.6.5.                                                           | Hyperlysinaemia                                        |      |        |
|                                                                  | S Alpha-aminoadipic semialdehyde synthase deficiency   |      | 605113 |
| 1.6.5.1.                                                         | Hyperlysinaemia type I                                 |      | 238700 |
|                                                                  | S Lysine : 2-oxoglutarate reductase deficiency         |      |        |
| 1.6.5.2.                                                         | Hyperlysinaemia type II                                |      | 268700 |
|                                                                  | S Saccharopine dehydrogenase deficiency                |      |        |
|                                                                  | S Saccharopinuria                                      |      |        |
| 1.6.6.                                                           | 2-Aminoadipic aciduria                                 |      | 204750 |
| 1.6.7.                                                           | 2-Oxadipic aciduria                                    |      | 245130 |
| 1.6.8.                                                           | Hydroxykynureninuria                                   |      | 236800 |
|                                                                  | S Kynureninase deficiency                              |      |        |
|                                                                  | S Xanthurenic aciduria                                 |      |        |
| 1.6.9.                                                           | Hydroxylysinaemia                                      |      | 236900 |
| <b>1.7. Disorders of serine, glycine or glycerate metabolism</b> |                                                        |      |        |
| 1.7.1.                                                           | Phosphoglycerate dehydrogenase deficiency              | E728 | 606879 |
| 1.7.2.                                                           | Phosphoserine phosphatase deficiency                   |      | 172480 |
| 1.7.3.                                                           | Phosphoserine aminotransferase deficiency              |      | 610992 |
| 1.7.4.                                                           | Nonketotic hyperglycinaemia                            | E725 | 238300 |
|                                                                  | S Glycine cleavage deficiency                          |      |        |
| 1.7.4.1.                                                         | P protein deficiency, <i>GLDC</i> gene                 |      | 238300 |
| 1.7.4.2.                                                         | T protein deficiency, <i>AMT</i> gene                  |      | 238310 |
| 1.7.4.3.                                                         | H protein deficiency, <i>GCSH</i> gene                 |      | 238330 |
| 1.7.5.                                                           | Sarcosinaemia                                          | E725 | 268900 |
|                                                                  | S Sarcosine dehydrogenase deficiency                   |      |        |
| 1.7.6.                                                           | D-glyceric aciduria                                    |      | 220120 |
|                                                                  | S D-glycerate kinase deficiency                        |      |        |
| <b>1.8. Disorders of ornithine or proline metabolism</b>         |                                                        |      |        |
| 1.8.1.                                                           | Ornithine aminotransferase deficiency                  |      |        |
|                                                                  | S Gyrate atrophy of retina and choroid                 |      |        |
| 1.8.2.                                                           | Hyperprolinaemia type I                                |      |        |
|                                                                  | S Proline oxidase deficiency                           |      |        |
| 1.8.3.                                                           | Hyperprolinaemia type II                               |      |        |
|                                                                  | S Pyrroline-5-carboxylate dehydrogenase deficiency     |      |        |
|                                                                  | S Aldehyde dehydrogenase deficiency                    |      |        |
| 1.8.4.                                                           | Hypoprolinaemia                                        |      |        |
|                                                                  | S Pyrroline-5-carboxylate synthase deficiency          |      | 138250 |
| 1.8.5.                                                           | Cutis laxa, autosomal recessive, type IIb              |      | 179035 |
|                                                                  | S Pyrroline-5-carboxylate reductase deficiency         |      |        |
| <b>1.9. Disorders of amino acid transport</b>                    |                                                        |      |        |
| 1.9.1.                                                           | Lysinuric protein intolerance                          | E723 | 222700 |
|                                                                  | S SLC7A7 carrier deficiency                            |      |        |
| 1.9.2.                                                           | Cystinuria                                             | E720 | 220100 |
| 1.9.3.                                                           | Cystinuria-hypotonia syndrome (contiguous gene defect) |      | 606407 |
| 1.9.4.                                                           | Hartnup disease                                        | E720 | 234500 |
| 1.9.5.                                                           | Iminoglycinuria                                        |      | 242600 |
| 1.9.6.                                                           | Lowe syndrome                                          | E720 | 309000 |
| 1.9.7.                                                           | Other disorders of amino acid transport                |      |        |
| <b>1.10. Other disorders of amino acid metabolism</b>            |                                                        |      |        |
| 1.10.1.                                                          | Glutamine synthetase deficiency                        |      |        |
| <b>1.11. Disorders of the gamma-glutamyl cycle</b>               |                                                        |      |        |
| 1.11.1.                                                          | Glutathionuria                                         |      |        |
|                                                                  | S Gamma-glutamyl transpeptidase deficiency             |      | 231950 |
| 1.11.2.                                                          | Cysteinylglycinase deficiency                          |      |        |
| 1.11.3.                                                          | Oxoprolinuria                                          |      | 260005 |
|                                                                  | S Oxoprolinase deficiency                              |      |        |

|                                                                   |                                                                    |      |        |
|-------------------------------------------------------------------|--------------------------------------------------------------------|------|--------|
| 1.11.4.                                                           | Gamma-glutamylcysteine synthetase deficiency                       |      | 230450 |
| 1.11.5.                                                           | Glutathione synthetase deficiency                                  |      | 266130 |
| <b>1.12. Other disorders of peptide metabolism</b>                |                                                                    |      |        |
| 1.12.1.                                                           | Prolidase deficiency                                               |      | 170100 |
|                                                                   | S Iminodipeptiuria                                                 |      |        |
| 1.12.2.                                                           | Carnosinaemia                                                      |      | 212200 |
| 1.12.3.                                                           | Homocarnosinosis                                                   | E728 | 236130 |
| <b>1.13. Other disorders of amino acid and protein metabolism</b> |                                                                    |      |        |
| <b>2. Disorders of carbohydrate metabolism</b>                    |                                                                    |      |        |
| <b>2.1. Disorders of galactose metabolism</b>                     |                                                                    |      |        |
| 2.1.1.                                                            | Classical galactosaemia                                            |      | 230400 |
|                                                                   | S Galactose-1-phosphate uridyltransferase deficiency               |      |        |
| 2.1.2.                                                            | Galactokinase deficiency                                           |      | 230200 |
| 2.1.3.                                                            | Uridine diphosphate galactose-4-epimerase deficiency               |      | 230350 |
| <b>2.2. Disorders of fructose metabolism</b>                      |                                                                    |      |        |
| 2.2.1.                                                            | Essential fructosuria                                              |      | 229800 |
|                                                                   | S Fructokinase deficiency                                          |      |        |
| 2.2.2.                                                            | Hereditary fructose intolerance                                    |      | 229600 |
|                                                                   | S Fructose-1-phosphate aldolase deficiency                         |      |        |
| <b>2.3. Disorders of pentose metabolism</b>                       |                                                                    |      |        |
| 2.3.1.                                                            | Essential pentosuria                                               |      | 260800 |
|                                                                   | S L-xylulose reductase deficiency                                  |      |        |
| 2.3.2.                                                            | Ribose-5-phosphate isomerase deficiency                            |      | 608611 |
| 2.3.3.                                                            | Transaldolase deficiency                                           |      | 606003 |
| <b>2.4. Disorders of glycerol metabolism</b>                      |                                                                    |      |        |
| 2.4.1.                                                            | Glycerol kinase deficiency                                         |      | 307030 |
| 2.4.2.                                                            | Complex glycerol kinase deficiency due to contiguous gene deletion |      | 300679 |
| <b>2.5. Disorders of glyoxylate metabolism</b>                    |                                                                    |      |        |
| 2.5.1.                                                            | Primary hyperoxaluria type I                                       |      | 260000 |
|                                                                   | S Alanine-glyoxylate aminotransferase deficiency                   |      |        |
| 2.5.2.                                                            | Primary hyperoxaluria type II                                      |      | 260000 |
|                                                                   | S Hydroxypyruvate reductase deficiency                             |      |        |
|                                                                   | S D-glycerate dehydrogenase deficiency                             |      |        |
| <b>2.6. Disorders of glucose transport</b>                        |                                                                    |      |        |
| 2.6.1.                                                            | Glucose transporter 1 deficiency (blood-brain barrier)             |      | 606777 |
|                                                                   | S GLUT1 deficiency syndrome                                        |      |        |
| 2.6.2.                                                            | Glucose transporter 2 deficiency                                   |      | 227810 |
|                                                                   | S Glycogen storage disease type XI                                 |      |        |
|                                                                   | S GLUT2 deficiency syndrome                                        |      |        |
|                                                                   | S Fanconi-Bickel syndrome                                          |      | 261670 |
| 2.6.3.                                                            | Glucose/galactose malabsorption                                    |      | 606824 |
|                                                                   | S Glucose/galactose cotransporter (SGLT1) deficiency               |      |        |
| <b>2.7. Disorders of gluconeogenesis</b>                          |                                                                    |      |        |
| 2.7.1.                                                            | Fructose-1,6-bisphosphatase deficiency                             |      | 229700 |
| 2.7.2.                                                            | Pyruvate carboxylase deficiency                                    |      | 266150 |
| 2.7.3.                                                            | Phosphoenolpyruvate carboxykinase deficiency                       | E744 | 261650 |
| <b>2.8. Glycogen storage disorders</b>                            |                                                                    |      |        |
| 2.8.1.                                                            | Glycogen storage disease type 1a                                   |      | 232200 |
|                                                                   | S GSD Ia                                                           |      |        |
|                                                                   | S von Gierke disease                                               |      |        |
|                                                                   | S Glucose-6-phosphatase deficiency                                 |      |        |
| 2.8.2.                                                            | Glycogen storage disease type 1b                                   |      | 232220 |
|                                                                   | S GSD Ib                                                           |      |        |
|                                                                   | S Glucose-6-phosphate transport deficiency                         |      |        |

|           |                                                    |  |        |
|-----------|----------------------------------------------------|--|--------|
| 2.8.3.    | Glycogen storage disease type II                   |  | 232300 |
|           | S GSD II                                           |  |        |
|           | S Pompe disease                                    |  |        |
|           | S Lysosomal alpha-1,4-glucosidase deficiency       |  |        |
| 2.8.4.    | Glycogen storage disease type III                  |  | 232400 |
|           | S GSD III                                          |  |        |
|           | S Cori disease                                     |  |        |
|           | S Amylo-1,6-glucosidase (debrancher) deficiency    |  |        |
| 2.8.5.    | Glycogen storage disease type IV                   |  | 232500 |
|           | S GSD IV                                           |  |        |
|           | S Andersen disease                                 |  |        |
|           | S Glycogen branching enzyme deficiency             |  |        |
| 2.8.6.    | Glycogen storage disease type V                    |  | 232600 |
|           | S GSD V                                            |  |        |
|           | S McArdle disease                                  |  |        |
|           | S Muscle phosphorylase deficiency                  |  |        |
| 2.8.7.    | Glycogen storage disease type VI                   |  | 232700 |
|           | S GSD VI                                           |  |        |
|           | S Hers disease                                     |  |        |
|           | S Hepatic glycogen phosphorylase deficiency        |  |        |
| 2.8.8.    | Glycogen storage disease type VII                  |  | 232800 |
|           | S GSD VII                                          |  |        |
|           | S Tauri disease                                    |  |        |
|           | S Muscle phosphofructokinase deficiency            |  |        |
| 2.8.9.    | Glycogen storage disease type IX                   |  | 306000 |
|           | S GSD IX                                           |  |        |
|           | S Phosphorylase kinase deficiency                  |  | 261740 |
| 2.8.9.1.  | Hepatic phosphorylase kinase deficiency            |  | 306000 |
|           | S GSD IXa                                          |  | 306000 |
| 2.8.9.2.  | Hepatic and muscle phosphorylase kinase deficiency |  | 261750 |
|           | S GSD Ixb                                          |  | 261750 |
| 2.8.9.3.  | Muscle phosphorylase kinase deficiency             |  | 300559 |
|           | S GSD IXd                                          |  | 300559 |
| 2.8.9.4.  | Cardiac muscle phosphorylase kinase deficiency     |  | 261740 |
| 2.8.10.   | Glycogen storage disease type X                    |  |        |
|           | S GSD X                                            |  |        |
|           | S Muscle phosphoglycerate mutase deficiency        |  | 261670 |
| 2.8.11.   | Glycogen storage disease type XI                   |  | 227810 |
|           | S GSD XI                                           |  |        |
|           | S Fanconi-Bickel syndrome                          |  | 261670 |
|           | S GLUT2 deficiency syndrome                        |  | 261670 |
| 2.8.12.   | Glycogen storage disease type XIV                  |  |        |
|           | S Muscle phosphoglucomutase 1 deficiency           |  | 612934 |
|           | S GSD XIV                                          |  |        |
| 2.8.13.   | Glycogen storage disease type XV                   |  |        |
|           | S Glycogenin deficiency                            |  | 612934 |
|           | S GSD XIV                                          |  |        |
| 2.8.14.   | Glycogen storage disease type 0a                   |  | 240600 |
|           | S GSD 0a                                           |  |        |
|           | S Liver glycogen synthase deficiency               |  |        |
| 2.8.15.   | Glycogen storage disease type 0b                   |  | 611556 |
|           | S GSD 0b                                           |  |        |
|           | S Muscle glycogen synthase deficiency              |  |        |
| 2.8.16.   | Other glycogen storage disease                     |  |        |
| 2.8.16.1. | Muscle LDH deficiency                              |  | 612933 |
| 2.8.16.2. | Aldolase A deficiency                              |  | 611881 |

|             |                                                                            |      |        |
|-------------|----------------------------------------------------------------------------|------|--------|
| 2.8.16.3.   | Beta-enolase deficiency                                                    |      | 612932 |
| 2.8.16.4.   | Muscle phosphoglycerate kinase deficiency                                  |      | 300653 |
| 2.8.17.     | Unspecified glycogen storage disease                                       |      |        |
| <b>2.9.</b> | <b>Other carbohydrate disorders</b>                                        |      |        |
| 2.9.1.      | Lactose intolerance                                                        |      | 223000 |
|             | S Lactase deficiency                                                       |      |        |
| 2.9.2.      | Disaccharide intolerance 1                                                 |      | 222900 |
|             | S Sucrase-isomaltase deficiency                                            |      |        |
| 2.9.3.      | Trehalase deficiency                                                       |      | 612119 |
|             |                                                                            |      |        |
| <b>3.</b>   | <b>Disorders of fatty acid and ketone body metabolism</b>                  |      |        |
| <b>3.1.</b> | <b>Disorders of lipolysis</b>                                              |      |        |
| <b>3.2.</b> | <b>Disorders of carnitine transport and the carnitine cycle</b>            |      |        |
| 3.2.1.      | Carnitine transporter deficiency                                           | E713 | 212140 |
|             | S Systemic primary carnitine deficiency                                    |      |        |
|             | S Carnitine uptake deficiency                                              |      |        |
| 3.2.2.      | Carnitine palmitoyltransferase I (CPTI) deficiency                         | E713 | 255120 |
| 3.2.3.      | Carnitine acylcarnitine translocase deficiency                             | E713 | 212138 |
| 3.2.4.      | Carnitine palmitoyltransferase II (CPTII) deficiency                       | E713 | 255110 |
| <b>3.3.</b> | <b>Disorders of mitochondrial fatty acid oxidation</b>                     |      |        |
| 3.3.1.      | Very long - chain acyl CoA dehydrogenase deficiency                        | E713 | 201475 |
|             | S VLCAD deficiency                                                         |      |        |
| 3.3.2.      | Mitochondrial trifunctional protein deficiency                             | E713 | 143450 |
|             | 3.3.2.1. Isolated deficiency of long-chain 3-hydroxyacyl-CoA dehydrogenase | E713 | 143450 |
|             | S LCHAD deficiency                                                         |      |        |
|             | 3.3.2.2. Isolated deficiency of long-chain 3-ketoacyl CoA thiolase         | E713 | 143450 |
| 3.3.3.      | Medium - chain acyl CoA dehydrogenase deficiency                           | E713 | 201450 |
|             | S MCAD deficiency                                                          |      |        |
| 3.3.4.      | Short - chain acyl CoA dehydrogenase deficiency                            | E713 | 201470 |
|             | S SCAD deficiency                                                          |      |        |
| 3.3.5.      | 3-alpha-hydroxyacyl- CoA dehydrogenase deficiency                          | E713 | 231530 |
|             | S HADH deficiency                                                          |      |        |
|             | S Short-chain 3-hydroxyacyl-CoA dehydrogenase deficiency                   |      |        |
|             | S SCHAD deficiency                                                         |      |        |
| 3.3.6.      | Multiple acyl-CoA dehydrogenase deficiency                                 | E713 | 231680 |
|             | S Glutaric aciduria type II                                                | E713 | 231680 |
|             | 3.3.6.1. Electron transfer flavoprotein deficiency, alpha chain            | E713 | 231680 |
|             | 3.3.6.2. Electron transfer flavoprotein deficiency, beta chain             | E713 | 130410 |
|             | 3.3.6.3. ETF-ubiquinone oxidoreductase deficiency                          | E713 | 231675 |
|             | S ETF-QO deficiency                                                        |      |        |
|             | S Electron transfer flavoprotein dehydrogenase deficiency                  |      |        |
| <b>3.4.</b> | <b>Disorders of ketone body metabolism</b>                                 |      |        |
| 3.4.1.      | 3-Hydroxy-3-Methylglutaryl-CoA synthase deficiency                         |      | 600234 |
| 3.4.2.      | Succinyl-CoA:3-Oxoacid-CoA transferase (SCOT) deficiency                   | E798 | 245050 |
| 3.4.3.      | Cytosolic acetoacetyl-CoA thiolase deficiency                              | E712 | 100678 |
| <b>3.5.</b> | <b>Other disorders of fatty acid and ketone body metabolism</b>            |      |        |
| 3.5.1.      | Long - chain acyl CoA dehydrogenase deficiency                             | E713 | 201460 |
| 3.5.2.      | Malonyl CoA decarboxylase deficiency                                       | E798 | 248360 |
|             | S Malonic aciduria                                                         |      |        |
|             |                                                                            |      |        |
| <b>4.</b>   | <b>Disorders of energy metabolism</b>                                      |      |        |
| <b>4.1.</b> | <b>Disorders of pyruvate metabolism</b>                                    |      |        |
| 4.1.1.      | Pyruvate dehydrogenase complex deficiency                                  |      |        |
|             | 4.1.1.1. Pyruvate dehydrogenase E1 $\alpha$ subunit deficiency             |      | 312170 |

|                                                                                                                                 |  |        |
|---------------------------------------------------------------------------------------------------------------------------------|--|--------|
| 4.1.1.2. Pyruvate dehydrogenase E1 $\beta$ subunit deficiency                                                                   |  | 179060 |
| 4.1.1.3. Dihydrolipoyl transacetylase deficiency                                                                                |  | 245348 |
| S PDHC E2 deficiency                                                                                                            |  | 608782 |
| 4.1.1.4. Dihydrolipoyl dehydrogenase deficiency                                                                                 |  | 248600 |
| S PDHC E3 deficiency                                                                                                            |  | 608782 |
| 4.1.1.5. Pyruvate dehydrogenase E3 binding protein deficiency                                                                   |  | 245349 |
| S Protein X deficiency                                                                                                          |  | 608782 |
| 4.1.1.6. Pyruvate dehydrogenase phosphatase deficiency                                                                          |  | 608782 |
| 4.1.1.7. Pyruvate dehydrogenase deficiency, unspecified                                                                         |  | 312170 |
| 4.1.2. Pyruvate kinase deficiency                                                                                               |  | 266200 |
| <b>4.2. Disorders of the citric acid cycle</b>                                                                                  |  |        |
| 4.2.1. 2-Oxoglutarate dehydrogenase deficiency                                                                                  |  | 203740 |
| S 2-Ketoglutarate dehydrogenase complex deficiency                                                                              |  |        |
| 4.2.2. Fumarase deficiency                                                                                                      |  | 136850 |
| S Fumaric aciduria                                                                                                              |  |        |
| <b>4.3. Mitochondrial respiratory chain disorders</b>                                                                           |  |        |
| 4.3.1. Respiratory chain disorders caused by mutations of mtDNA                                                                 |  |        |
| 4.3.1.1. Large-scale single deletion of mtDNA                                                                                   |  |        |
| 4.3.1.1.1. Pearson Syndrome                                                                                                     |  | 557000 |
| 4.3.1.1.2. Kearns Sayre Syndrome                                                                                                |  | 530000 |
| S Chronic External Ophthalmoplegia (CPEO), pigmentary degeneration of retina, myopathy and cardiomyopathy [onset before 20 yrs] |  |        |
| 4.3.1.1.3. Chronic Progressive External Ophthalmoplegia (CPEO) with Mitochondrial Myopathy [onset after 20 yrs]                 |  | n/a    |
| 4.3.1.2. Point mutations of mtDNA                                                                                               |  |        |
| 4.3.1.2.1. Mitochondrial encephalomyopathy lactic acidosis and stroke-like episodes, MELAS                                      |  | 540000 |
| 4.3.1.2.2. Myoclonic epilepsy associated with ragged red fibres, MERRF                                                          |  | 545000 |
| 4.3.1.2.3. Neuropathy Ataxia and Retinitis Pigmentosa, NARP                                                                     |  | 551500 |
| 4.3.1.2.4. Leber Hereditary Optic Neuropathy, LHON                                                                              |  | 535000 |
| 4.3.1.2.5. Maternally Inherited Leigh Syndrome, MILS                                                                            |  | 256000 |
| 4.3.1.2.6. Sporadic Leigh Syndrome                                                                                              |  | 256000 |
| 4.3.1.2.7. Maternally inherited Mitochondrial Dystonia                                                                          |  | 500001 |
| 4.3.1.2.8. Maternally inherited Mitochondrial Cardiomyopathy                                                                    |  | n/a    |
| 4.3.1.2.9. Maternally inherited Mitochondrial Myopathy                                                                          |  | n/a    |
| 4.3.1.2.9.1. 'Pure' Mitochondrial Myopathy                                                                                      |  | n/a    |
| 4.3.1.2.9.2. Lethal Infantile Mitochondrial Myopathy                                                                            |  | 551000 |
| 4.3.1.2.9.3. Mitochondrial Myopathy with Diabetes Mellitus                                                                      |  | 500002 |
| 4.3.1.2.9.4. Mitochondrial Myopathy with Reversible cytochrome c oxidase (COX) Deficiency                                       |  | 500009 |
| 4.3.1.2.10. Maternally inherited deafness and diabetes, MIDD                                                                    |  | 520000 |
| 4.3.2. Respiratory chain disorders caused by mutations of nuclear DNA                                                           |  |        |
| 4.3.2.1. Mitochondrial DNA Depletion Syndromes                                                                                  |  |        |
| 4.3.2.1.1. Alpers-Huttenlocher Syndrome ( <i>POLG</i> )                                                                         |  | 203700 |
| 4.3.2.1.2. Hepatocerebral ( <i>DGUOK, MPV17, PEO1</i> )                                                                         |  | 251880 |
| 4.3.2.1.3. Myopathic ( <i>TK2</i> )                                                                                             |  | 609560 |
| 4.3.2.1.4. Encephalomyopathy with methylmalonic aciduria ( <i>SUCLA2</i> )                                                      |  | 612073 |
| 4.3.2.1.5. Fatal Infantile Lactic Acidosis with methylmalonic aciduria ( <i>SUCLG1</i> )                                        |  | 245400 |
| 4.3.2.1.6. Encephalomyopathic with renal tubulopathy ( <i>RRM2B</i> )                                                           |  | 612075 |
| 4.3.2.1.7. Childhood-onset autosomal dominant optic atrophy                                                                     |  | 165500 |



|              |                                                                                                                                                                                                                                             |  |        |
|--------------|---------------------------------------------------------------------------------------------------------------------------------------------------------------------------------------------------------------------------------------------|--|--------|
|              | (OPA1)                                                                                                                                                                                                                                      |  |        |
| 4.3.2.1.8.   | Mitochondrial Neurogastrointestinal Encephalopathy, MNGIE ( <i>ECGF1</i> )                                                                                                                                                                  |  | 603041 |
| 4.3.2.2.     | Multiple mtDNA Deletion Syndromes                                                                                                                                                                                                           |  |        |
| 4.3.2.2.1.   | Progressive External Ophthalmoplegia Autosomal Dominant (PEOA)                                                                                                                                                                              |  |        |
| 4.3.2.2.1.1. | PEOA1 ( <i>POLG</i> )                                                                                                                                                                                                                       |  | 157640 |
| 4.3.2.2.1.2. | PEOA2 ( <i>ANT1</i> )                                                                                                                                                                                                                       |  | 609283 |
| 4.3.2.2.1.3. | PEOA3 ( <i>PEO1</i> )                                                                                                                                                                                                                       |  | 609286 |
| 4.3.2.2.1.4. | PEOA4 ( <i>POLG2</i> )                                                                                                                                                                                                                      |  | 610131 |
| 4.3.2.2.1.5. | PEOA5 ( <i>RRM2B</i> )                                                                                                                                                                                                                      |  | 613077 |
| 4.3.2.2.2.   | Progressive External Ophthalmoplegia Autosomal Recessive (PEOB)                                                                                                                                                                             |  | 258450 |
| 4.3.2.2.3.   | Sensory Ataxic Neuropathy, Dysarthria and Ophthalmoparesis, SANDO                                                                                                                                                                           |  | 607459 |
|              | S Mitochondrial Recessive Ataxic Syndrome, MIRAS ( <i>POLG</i> )                                                                                                                                                                            |  |        |
|              | S Spinocerebellar Ataxia with Epilepsy, SCAE                                                                                                                                                                                                |  |        |
| 4.3.2.2.4.   | Optic Atrophy 1 and Deafness ( <i>OPA1</i> )                                                                                                                                                                                                |  | 125250 |
|              | S Optic Atrophy, Deafness, Ophthalmoplegia, Myopathy                                                                                                                                                                                        |  |        |
| 4.3.2.3.     | Leigh Syndrome, LS                                                                                                                                                                                                                          |  | 256000 |
|              | S Subacute Necrotizing Encephalopathy                                                                                                                                                                                                       |  |        |
| 4.3.2.3.1.   | LS with leukodystrophy ( <i>SDHA</i> , <i>SURF1</i> )                                                                                                                                                                                       |  | 220110 |
| 4.3.2.3.2.   | LS with cardiomyopathy ( <i>COX10</i> , <i>COX15</i> )                                                                                                                                                                                      |  | 220110 |
| 4.3.2.3.3.   | LS with French-Canadian ethnicity ( <i>LRPPRC</i> )                                                                                                                                                                                         |  | 220111 |
| 4.3.2.3.4.   | LS with nephrotic syndrome ( <i>PDSS2</i> )                                                                                                                                                                                                 |  | 607426 |
| 4.3.2.3.5.   | LS with nephropathy ( <i>COQ2</i> )                                                                                                                                                                                                         |  | 607426 |
| 4.3.2.4.     | Ubiquinone (CoQ10) deficiency (Non-LS)                                                                                                                                                                                                      |  | 607426 |
| 4.3.2.4.1.   | Early-onset ataxia with oculomotor apraxia and hypoalbuminaemia ( <i>APTX</i> )                                                                                                                                                             |  | 607426 |
| 4.3.2.4.2.   | Deafness, encephaloneuropathy, obesity and valvulopathy ( <i>PDSS1</i> )                                                                                                                                                                    |  | 607426 |
| 4.3.2.4.3.   | Cerebellar atrophy, ataxia and seizures ( <i>CABC1</i> )                                                                                                                                                                                    |  | 607426 |
| 4.3.2.5.     | Growth Retardation, Aminoaciduria, Cholestasis, Iron overload, Lactic acidosis and Early death (GRACILE) Syndrome ( <i>BCS1L</i> )                                                                                                          |  | 603358 |
| 4.3.2.6.     | Renal tubulopathy, encephalopathy and liver failure ( <i>BCS1L</i> )                                                                                                                                                                        |  | 124000 |
| 4.3.2.7.     | Cardio-encephalopathy with hyperammonaemia ( <i>TMEM70</i> )                                                                                                                                                                                |  | 604273 |
|              | S ATP synthase deficiency, nuclear-encoded                                                                                                                                                                                                  |  |        |
| 4.3.2.8.     | Exercise Intolerance with Lactic Acidosis                                                                                                                                                                                                   |  |        |
| 4.3.2.8.1.   | Complex I deficiency; riboflavin responsive ( <i>ACAD9</i> )                                                                                                                                                                                |  | 611126 |
| 4.3.2.8.2.   | Complex I and II deficiency ( <i>ISCU</i> )                                                                                                                                                                                                 |  | 255125 |
| 4.3.2.9.     | Isolated Oxidative Phosphorylation Defects with Variable Phenotype (Not Classified Elsewhere)                                                                                                                                               |  |        |
| 4.3.2.9.1.   | Complex I structural subunit gene defect ( <i>NDUFV1</i> , <i>NDUFV2</i> , <i>NDUFS1</i> , <i>NDUFS2</i> , <i>NDUFS3</i> , <i>NDUFS4</i> , <i>NDUFS6</i> , <i>NDUFS7</i> , <i>NDUFS8</i> , <i>NDUFA1</i> , <i>NDUFA2</i> , <i>NDUFA11</i> ) |  | n/a    |
| 4.3.2.9.2.   | Complex I assembly gene defect ( <i>C20orf7</i> , <i>NDUFAF1</i> , <i>NDUFAF2</i> , <i>NDUFAF3</i> , <i>NDUFAF4</i> , <i>C80orf38</i> , <i>NUBPL</i> , <i>FOXRED1</i> )                                                                     |  | n/a    |
| 4.3.2.9.3.   | Complex II structural subunit gene defect ( <i>SDHA</i> , <i>SDHB</i> , <i>SDHC</i> , <i>SDHD</i> )                                                                                                                                         |  | n/a    |
| 4.3.2.9.4.   | Complex II assembly gene defect ( <i>SDHAF1</i> )                                                                                                                                                                                           |  | n/a    |
| 4.3.2.9.5.   | Complex III structural subunit gene defect ( <i>UQCRB</i> , <i>UQCRCQ</i> )                                                                                                                                                                 |  | n/a    |

|              |                                                                                                    |        |
|--------------|----------------------------------------------------------------------------------------------------|--------|
| 4.3.2.9.6.   | Complex III assembly gene defect                                                                   | n/a    |
| 4.3.2.9.7.   | Complex IV structural subunit gene defect (COX6B1)                                                 | n/a    |
| 4.3.2.9.8.   | Complex IV assembly gene defect (SCO1, SCO2, SURF1, COX10, COX15, TACO1, FASTKD2)                  | n/a    |
| 4.3.2.9.9.   | Complex V structural subunit gene defect (ATP5E)                                                   | n/a    |
| 4.3.2.9.10.  | Complex V assembly gene defect (ATPAF2, TMEM70)                                                    | n/a    |
| 4.3.2.10.    | Mitochondrial Protein Translation Defects                                                          |        |
| 4.3.2.10.1.  | Combined Oxidative Phosphorylation Defect 1, COXPD1 (EFG1)                                         | 609060 |
| 4.3.2.10.2.  | Combined Oxidative Phosphorylation Defect 2, COXPD2 (MRPS16)                                       | 610498 |
| 4.3.2.10.3.  | Combined Oxidative Phosphorylation Defect 3, COXPD3 (TSFM)                                         | 610505 |
| 4.3.2.10.4.  | Combined Oxidative Phosphorylation Defect 4, COXPD4 (TUFM)                                         | 610678 |
| 4.3.2.10.5.  | Combined Oxidative Phosphorylation Defect 5, COXPD5 (MRPS22)                                       | 611719 |
| 4.3.2.10.6.  | Combined Oxidative Phosphorylation Defect 6, COXPD6 (AIFM1)                                        | 300816 |
| 4.3.2.10.7.  | Combined Oxidative Phosphorylation Defect 7, COXPD7 (C10ORF65)                                     | 613559 |
| 4.3.2.10.8.  | Myopathy, Lactic Acidosis and Sideroblastic Anaemia 1, MLASA1 (PUS1)                               | 600462 |
| 4.3.2.10.9.  | Acute Infantile Liver Failure (TRMU)                                                               | 613070 |
| 4.3.2.10.10. | Leukoencephalopathy with brainstem and spinal cord involvement and lactate elevation, LBSL (DARS2) | 611105 |
| 4.3.2.10.11. | Pontocerebellar hypoplasia Type 6 (RARS2)                                                          | 611523 |
| 4.3.2.10.12. | Myopathy, Lactic Acidosis and Sideroblastic Anaemia 2, MLASA2 (YARS2)                              | 613561 |
| 4.3.3.       | Respiratory chain deficiencies with no known genetic basis                                         |        |
| 4.3.3.1.     | Complex I deficiency                                                                               | 252010 |
| 4.3.3.2.     | Complex II deficiency                                                                              | 252011 |
| 4.3.3.3.     | Complex III deficiency                                                                             | 124000 |
| 4.3.3.4.     | Complex IV deficiency                                                                              | 220110 |
| 4.3.3.5.     | ATP synthase deficiency                                                                            | 604273 |
| 4.3.3.6.     | Combined respiratory chain deficiency                                                              | n/a    |
| <b>4.4.</b>  | <b>Mitochondrial membrane transport disorders</b>                                                  |        |
| 4.4.1.       | Mitochondrial substrate carrier disorders                                                          |        |
| 4.4.1.1.     | Mitochondrial phosphate carrier deficiency (SLC25A3)                                               | 600370 |
| 4.4.1.2.     | Mitochondrial aspartate glutamate carrier 1 deficiency (SLC25A12)                                  | 603667 |
| 4.4.1.3.     | Mitochondrial glutamate carrier 1 deficiency (SLC25A22)                                            | 609302 |
| 4.4.1.4.     | Mitochondrial carrier SLC25A38, haem biosynthesis, sideroblastic anaemia                           | 610819 |
| 4.4.2.       | Mitochondrial protein import disorders                                                             |        |
| 4.4.2.1.     | Mohr-Tranebjaerg syndrome (TIMM8A)                                                                 | 300356 |
| <b>4.5.</b>  | <b>Unspecified mitochondrial disorders</b>                                                         |        |
| 4.5.1.       | Leigh syndrome with no known genetic or respiratory chain deficiency                               | 256000 |
| 4.5.2.       | Ethylmalonic Encephalopathy (ETHE1)                                                                | 602473 |
| 4.5.3.       | Anaemia, sideroblastic, and spinocerebellar ataxia, ASAT (ABCB7)                                   | 301310 |
| <b>4.6.</b>  | <b>Disorders of creatine metabolism</b>                                                            |        |
| 4.6.1.       | Creatine transporter deficiency                                                                    |        |
|              | S X-linked creatine deficiency syndrome                                                            | 300352 |
|              | S SLC6A8 deficiency                                                                                | 300352 |
| 4.6.2.       | Guanidinoacetate methyltransferase deficiency                                                      | 612736 |

|             |                                                                            |        |
|-------------|----------------------------------------------------------------------------|--------|
| 4.6.3.      | Arginine:glycine amidinotransferase deficiency                             | 612718 |
| <b>4.7.</b> | <b>Other disorders of energy metabolism</b>                                |        |
| <b>5.</b>   | <b>Disorders in the metabolism of purines, pyrimidines and nucleotides</b> |        |
| <b>5.1.</b> | <b>Disorders of purine metabolism</b>                                      |        |
| 5.1.1.      | Primary idiopathic gout                                                    | 138900 |
| 5.1.2.      | Familial juvenile hyperuricaemic nephropathy                               | 162000 |
|             | S Familial nephropathy with gout                                           |        |
| 5.1.3.      | Adenylosuccinate lyase deficiency                                          | 103050 |
| 5.1.4.      | AICAR transformylase deficiency                                            | 601731 |
|             | S IMP cyclohydrolase deficiency                                            |        |
| 5.1.5.      | Adenosine deaminase deficiency                                             | 102700 |
| 5.1.6.      | Deoxyguanosine kinase deficiency                                           | 251880 |
| 5.1.7.      | Myoadenylate deaminase deficiency                                          | 102770 |
| 5.1.8.      | Lesch-Nyhan syndrome                                                       | 308000 |
|             | S Hypoxanthine-guanine phosphoribosyltransferase deficiency                |        |
| 5.1.9.      | Adenine phosphoribosyl transferase deficiency                              | 102600 |
| 5.1.10.     | Phosphoribosyl pyrophosphate synthetase 1 defects                          | 311850 |
| 5.1.10.1.   | Phosphoribosyl pyrophosphate synthase superactivity                        | 300661 |
| 5.1.10.2.   | X-linked Charcot-Marie-Tooth disease-5                                     | 311070 |
| 5.1.10.3.   | Arts syndrome                                                              | 301835 |
| 5.1.10.4.   | X-linked sensorineural deafness                                            | 304500 |
| 5.1.11.     | Inosine triphosphatase deficiency                                          | 147520 |
| 5.1.12.     | Adenosine deaminase superactivity                                          |        |
| 5.1.13.     | Purine nucleoside phosphorylase deficiency                                 | 164050 |
| 5.1.14.     | Mitochondrial Ribonucleotide Reductase subunit 2 deficiency                | 604712 |
| 5.1.15.     | Xanthinuria type I                                                         | 278300 |
|             | S Xanthine oxidase deficiency                                              |        |
| 5.1.16.     | Xanthinuria type II                                                        | 603592 |
|             | S Combined deficiency of xanthine and aldehyde oxidase                     |        |
| 5.1.17.     | Thiopurine S-methyltransferase deficiency                                  | 610460 |
| <b>5.2.</b> | <b>Disorders of pyrimidine metabolism</b>                                  |        |
| 5.2.1.      | Orotic aciduria type I                                                     | 258900 |
|             | S Uridine monophosphate synthase deficiency                                |        |
| 5.2.2.      | Orotic aciduria type II                                                    | 258920 |
|             | S Orotidine - 5 -phosphate decarboxylase deficiency                        |        |
| 5.2.3.      | Pyrimidine - 5 - nucleotidase deficiency                                   | 266120 |
| 5.2.4.      | Dihydroorotate dehydrogenase deficiency                                    | 263750 |
| 5.2.5.      | Uridine-5'-monophosphate hydrolase superactivity                           | 266120 |
| 5.2.6.      | Thymidine phosphorylase deficiency                                         | 131222 |
| 5.2.7.      | Thymidine kinase 2 deficiency                                              | 609560 |
| 5.2.8.      | Dihydropyrimidine dehydrogenase deficiency                                 | 274270 |
| 5.2.9.      | Dihydropyrimidinase deficiency                                             | 222748 |
| 5.2.10.     | Beta-ureidopropionase deficiency                                           | 613161 |
|             | S Beta-alanine synthase deficiency                                         |        |
| 5.2.11.     | Hyper-beta-alaninaemia                                                     | 237400 |
|             | S Beta-alanine-2-ketoglutarate transaminase deficiency                     |        |
| 5.2.12.     | Beta-aminoisobutyrate-pyruvate transaminase deficiency                     | 210100 |
| <b>5.3.</b> | <b>Disorders of nucleotide metabolism</b>                                  |        |
| 5.3.1.      | Aicardi-Goutières Syndrome (AGS)                                           |        |
| 5.3.1.1.    | AGS1                                                                       | 225750 |
|             | S TREX1 deficiency                                                         |        |
|             | S DNase III deficiency                                                     |        |
| 5.3.1.2.    | AGS2                                                                       | 610181 |
|             | S RNASEH2B deficiency                                                      |        |

|                                                                                  |      |        |
|----------------------------------------------------------------------------------|------|--------|
| 5.3.1.3. AGS3                                                                    |      | 610181 |
| S RNASEH2C deficiency                                                            |      |        |
| 5.3.1.4. AGS4                                                                    |      | 610181 |
| S RNASEH2A deficiency                                                            |      |        |
| 5.3.1.5. AGS5                                                                    |      | 612952 |
| S SAMHD1deficiency                                                               |      |        |
| 5.3.2. RNASET2-deficient cystic leukoencephalopathy                              |      | 612951 |
| <b>6. Disorders of the metabolism of sterols</b>                                 |      |        |
| <b>6.1. Disorders of sterol biosynthesis</b>                                     |      |        |
| 6.1.1. Mevalonate kinase deficiency                                              |      | 610377 |
| S Mevalonic aciduria                                                             |      | 610377 |
| S Hyper-IgD syndrome (HIDS)                                                      |      | 260920 |
| 6.1.2. Smith - Lemli - Opitz syndrome                                            | Q871 | 270400 |
| S 7-Dehydrocholesterol reductase deficiency                                      | Q871 | 270400 |
| 6.1.3. X-linked dominant chondrodysplasia punctata 2                             |      | 302960 |
| S Conradi-Hünermann syndrome                                                     |      | 302960 |
| S 3 $\beta$ -hydroxysteroid- $\Delta$ 8, $\Delta$ 7-isomerase deficiency         |      | 302960 |
| 6.1.4. Congenital hemidysplasia with ichthyosiform erythroderma and limb defects |      | 308050 |
| S CHILD syndrome                                                                 |      | 308050 |
| S 3 $\beta$ -hydroxysteroid C-4 dehydrogenase deficiency                         |      | 308050 |
| 6.1.5. Desmosterolosis                                                           |      | 602398 |
| S Desmosterol reductase deficiency                                               |      | 602398 |
| S 3 $\beta$ -hydroxysterol- $\Delta$ 24-reductase deficiency                     |      | 602398 |
| 6.1.6. Lathosterolosis                                                           |      | 607330 |
| S 3 $\beta$ -hydroxysterol $\Delta$ 5-desaturase deficiency                      |      | 607330 |
| 6.1.7. Greenberg skeletal dysplasia                                              |      | 215140 |
| S Hydrops-ectopic calcification-moth-eaten skeletal dysplasia                    |      | 215140 |
| S 3 $\beta$ -hydroxysterol $\Delta$ 14-reductase deficiency                      |      | 215140 |
| <b>6.2. Disorders of bile acid biosynthesis</b>                                  |      |        |
| 6.2.1. 3- $\beta$ -hydroxysterol $\Delta$ 5-oxidoreductase/isomerase deficiency  |      |        |
| S Progressive familial intrahepatic cholestasis type 4                           |      |        |
| 6.2.2. $\Delta$ 4-3-oxysterol 5 $\beta$ -reductase deficiency                    |      |        |
| 6.2.3. Oxysterol 7-alpha-hydroxylase                                             |      |        |
| 6.2.4. Cholesterol 7-alpha-hydroxylase                                           |      |        |
| 6.2.5. Cerebrotendinous xanthomatosis                                            |      | 213700 |
| S Sterol 27-hydroxylase deficiency                                               |      | 213700 |
| S Van Bogaert-Scherer-Epstein disease                                            |      | 213700 |
| S Cholestanol storage disease                                                    |      | 213700 |
| <b>6.3. Disorders of bile acid metabolism and transport</b>                      |      |        |
| 6.3.1. Bilirubin UDP-glucuronosyltransferase 1 deficiency                        |      |        |
| S Crigler-Najjar disease                                                         |      |        |
| S Gilbert disease                                                                |      |        |
| 6.3.2. Byler disease                                                             |      |        |
| S Progressive familial intrahepatic cholestasis type 1                           |      |        |
| S ATP8B1 deficiency                                                              |      |        |
| 6.3.3. Progressive familial intrahepatic cholestasis type 2                      |      |        |
| S ABCB11 deficiency                                                              |      |        |
| 6.3.4. Progressive familial intrahepatic cholestasis type 3                      |      |        |
| S ABCB4 deficiency                                                               |      |        |
| S Class III multidrug resistance P-glycoprotein deficiency                       |      |        |
| <b>6.4. Other disorders in the metabolism of sterols</b>                         |      |        |
| 6.4.1. X-linked ichthyosis                                                       |      | 308100 |
| S Steroid sulphatase deficiency                                                  |      |        |

|                                                              |                                                               |      |        |
|--------------------------------------------------------------|---------------------------------------------------------------|------|--------|
| S                                                            | Steroid sulphatase deficiency due to contiguous gene deletion |      |        |
| <b>7. Disorders of porphyrin and haem metabolism</b>         |                                                               |      |        |
| 7.1.1.                                                       | Erythropoietic porphyria                                      |      | 177000 |
|                                                              | S Ferrochelatase deficiency                                   |      |        |
| 7.1.2.                                                       | X-linked dominant protoporphyria                              |      | 300752 |
|                                                              | S Erythroid d 5-aminolevulinate synthase (gain of function)   |      |        |
| 7.1.3.                                                       | Variegate porphyria                                           |      | 176200 |
|                                                              | S Protoporphyrinogen oxidase deficiency                       |      |        |
| 7.1.4.                                                       | X-linked sideroblastic anaemia (XLSA)                         |      | 300751 |
|                                                              | S Erythroid 5-aminolevulinate deficiency                      |      |        |
| 7.1.5.                                                       | Congenital erythropoietic porphyria                           |      | 263700 |
|                                                              | S Uroporphyrinogen III synthase deficiency                    |      |        |
| 7.1.6.                                                       | Acute intermittent porphyria                                  |      | 176000 |
|                                                              | S Porphobilinogen deaminase deficiency                        |      |        |
| 7.1.7.                                                       | Hereditary coproporphyria                                     |      | 121300 |
|                                                              | S Coproporphyrinogen oxidase deficiency                       |      |        |
| 7.1.8.                                                       | Porphyria cutanea tarda type I (sporadic)                     |      | 176090 |
|                                                              | S Hepatic uroporphyrinogen decarboxylase deficiency           |      |        |
| 7.1.9.                                                       | Porphyria cutanea tarda type II (familial)                    |      | 176100 |
|                                                              | S Uroporphyrinogen decarboxylase deficiency                   |      |        |
| 7.1.10.                                                      | Acute hepatic porphyria                                       |      | 612740 |
|                                                              | S Delta aminolevulinic acid dehydratase deficiency            |      |        |
| <b>8. Disorders of lipid and lipoprotein metabolism</b>      |                                                               |      |        |
| <b>8.1. Inherited hypercholesterolaemias</b>                 |                                                               |      |        |
| 8.1.1.                                                       | Disorder of low density lipoprotein receptor                  | E780 | 143890 |
|                                                              | S Fredrickson type IIa hyperlipoproteinaemia                  | E780 | 143890 |
| 8.1.1.1.                                                     | Familial hypercholesterolaemia – homozygous                   | E780 |        |
| 8.1.1.2.                                                     | Familial hypercholesterolaemia – heterozygous                 | E780 |        |
| 8.1.2.                                                       | Sitosterolaemia                                               | E755 | 210250 |
|                                                              | S Phytosterolaemia                                            |      | 210250 |
|                                                              | S Sitosterolaemia with xanthomatosis                          | E755 | 210250 |
| <b>8.2. Inherited hypertriglyceridaemias</b>                 |                                                               |      |        |
| 8.2.1.                                                       | Familial chylomicronaemia                                     | E786 | 238600 |
|                                                              | S Hyperlipidaemia Type 1                                      | E786 | 238600 |
| 8.2.1.1.                                                     | Familial lipoprotein lipase deficiency                        | E786 | 238600 |
| 8.2.1.2.                                                     | Familial apolipoprotein C - II deficiency                     | E786 | 207750 |
| 8.2.2.                                                       | Familial hypertriglyceridaemia                                | E786 | 238600 |
| <b>8.3. Inherited mixed hyperlipidaemias</b>                 |                                                               |      |        |
| 8.3.1.                                                       | Familial dysbetalipoproteinaemia                              | E782 | 107741 |
|                                                              | S Apolipoprotein E deficiency                                 | E782 | 107741 |
|                                                              | S Fredrickson type III hyperlipoproteinaemia                  | E782 | 107741 |
|                                                              | S Remnant hyperlipidaemia                                     | E782 | 107741 |
| 8.3.1.1.                                                     | Dysfunctional apo E                                           |      |        |
| 8.3.2.                                                       | Familial combined hyperlipoproteinaemia                       |      |        |
| 8.3.3.                                                       | Hepatic lipase deficiency                                     |      |        |
| <b>8.4. Disorders of high density lipoprotein metabolism</b> |                                                               |      |        |
| 8.4.1.                                                       | Apolipoprotein A-I deficiency                                 | E786 |        |
| 8.4.2.                                                       | Tangier disease                                               | E786 | 205400 |
|                                                              | S Familial hypoalphalipoproteinaemia                          | E786 | 205400 |
| 8.4.3.                                                       | Lecithin cholesterol acyltransferase deficiency               |      |        |
| 8.4.3.1.                                                     | Fish-eye disease                                              | E786 | 136120 |
| 8.4.3.2.                                                     | Norum disease                                                 | E786 | 245900 |
| 8.4.4.                                                       | Familial hyperalphalipoproteinaemia                           |      |        |

|                                                                                             |                                                              |      |        |
|---------------------------------------------------------------------------------------------|--------------------------------------------------------------|------|--------|
| S                                                                                           | Cholesterol ester transfer protein deficiency                |      |        |
| <b>8.5. Inherited hypolipidaemias</b>                                                       |                                                              |      |        |
| 8.5.1.                                                                                      | Familial abetalipoproteinaemia                               | E786 | 200100 |
|                                                                                             | S Microsomal triglyceride transfer protein (MTTP) deficiency | E786 | 157147 |
| 8.5.2.                                                                                      | Familial hypobetalipoproteinaemia                            | E786 | 200100 |
|                                                                                             | S Apolipoprotein B deficiency                                | E786 | 107730 |
| 8.5.3.                                                                                      | Anderson disease                                             |      |        |
| <b>8.6. Other disorders of lipid and lipoprotein metabolism</b>                             |                                                              |      |        |
| 8.6.1.1.                                                                                    | Sjögren - Larsson syndrome                                   | Q898 | 270200 |
|                                                                                             | S Fatty alcohol:NAD+ oxidoreductase deficiency               | Q898 | 270200 |
| 8.6.1.2.                                                                                    | Pancreatic triacylglycerol lipase deficiency                 | E888 | 246600 |
| 8.6.1.3.                                                                                    | Pancreatic colipase deficiency                               | E755 | 120105 |
| <b>8.7. Unspecified disorders of lipid and lipoprotein metabolism</b>                       |                                                              |      |        |
| <b>9. Congenital disorders of glycosylation and other disorders of protein modification</b> |                                                              | E778 |        |
| S                                                                                           | CDG                                                          | E778 |        |
| <b>9.1. Disorders of protein N-glycosylation</b>                                            |                                                              |      |        |
| 9.1.1.                                                                                      | Phosphomannomutase 2 deficiency                              | E744 | 601785 |
|                                                                                             | S PMM2-CDG                                                   | E744 | 601785 |
|                                                                                             | S CDG-Ia                                                     | E744 | 601785 |
| 9.1.2.                                                                                      | Phosphomannose isomerase deficiency                          | E778 | 602579 |
|                                                                                             | S MPI-CDG                                                    |      | 602579 |
|                                                                                             | S CDG-Ib                                                     | E778 | 602579 |
| 9.1.3.                                                                                      | Glucosyltransferase 1 deficiency                             | E744 | 603147 |
|                                                                                             | S ALG6-CDG                                                   |      | 603147 |
|                                                                                             | S CDG-Ic                                                     | E744 | 603147 |
| 9.1.4.                                                                                      | Mannosyltransferase 6 deficiency                             | E744 | 601110 |
|                                                                                             | S NOT56L-CDG                                                 |      | 601110 |
|                                                                                             | S CDG-Id                                                     | E744 | 601110 |
| 9.1.5.                                                                                      | Mannosyltransferase 8 deficiency                             | E744 | 607143 |
|                                                                                             | S ALG 12-CDG                                                 |      | 607143 |
|                                                                                             | S CDG-Ig                                                     | E744 | 607143 |
| 9.1.6.                                                                                      | Glucosyltransferase 2 deficiency                             | E744 | 608104 |
|                                                                                             | S ALG 8-CDG                                                  |      | 608104 |
|                                                                                             | S CDG-Ih                                                     | E744 | 608104 |
| 9.1.7.                                                                                      | Mannosyltransferase 2 deficiency                             |      | 607906 |
|                                                                                             | S ALG 2-CDG                                                  |      | 607906 |
|                                                                                             | S CDG-Ii                                                     |      | 607906 |
| 9.1.8.                                                                                      | UDP-GlcNAc:Dol-P-GlcNAc-P transferase deficiency             |      | 608093 |
|                                                                                             | S DPAGT1-CDG                                                 |      | 608093 |
|                                                                                             | S CDG-Ij                                                     |      | 608093 |
| 9.1.9.                                                                                      | Mannosyltransferase 1 deficiency                             |      | 608540 |
|                                                                                             | S HMT1-CDG                                                   |      | 608540 |
|                                                                                             | S CDG-Ik                                                     |      | 608540 |
| 9.1.10.                                                                                     | Mannosyltransferase 7-9 deficiency                           |      | 608776 |
|                                                                                             | S DIBD1-CDG                                                  |      | 608776 |
|                                                                                             | S CDG-Il                                                     |      | 608776 |
| 9.1.11.                                                                                     | Flippase of Man5GlcNAc2-PP-Dol deficiency                    |      | 611633 |
|                                                                                             | S RFT1-CDG                                                   |      | 611633 |
|                                                                                             | S CDG-In                                                     |      | 611633 |
| 9.1.12.                                                                                     | N-acetylglucosaminyltransferase deficiency                   |      | 602616 |
|                                                                                             | S MGAT2-CDG                                                  |      | 602616 |
|                                                                                             | S CDG-IIa                                                    |      | 602616 |
| 9.1.13.                                                                                     | Glucosidase 1 deficiency                                     |      | 606056 |

|             |                                                                                             |      |        |
|-------------|---------------------------------------------------------------------------------------------|------|--------|
| S           | GLS1-CDG                                                                                    |      | 606056 |
| S           | CDG-IIb                                                                                     |      | 606056 |
| 9.1.14.     | TUSC3-CDG                                                                                   |      | 601385 |
| 9.1.15.     | SRD5A3-CDG                                                                                  |      |        |
| <b>9.2.</b> | <b>Disorders of protein O-glycosylation</b>                                                 | E744 |        |
| 9.2.1.      | O-xylosylglycan synthesis deficiencies                                                      |      |        |
| 9.2.1.1.    | EXT1 deficiency                                                                             |      | 608177 |
| 9.2.1.2.    | EXT2 deficiency                                                                             |      | 608210 |
| 9.2.1.3.    | Beta-1,4-galactosyltransferase 7 deficiency                                                 |      | 604327 |
| S           | B4GALT7 deficiency                                                                          |      | 604327 |
| 9.2.2.      | O-N-acetylgalactosaminylglycan synthesis deficiencies                                       |      |        |
| 9.2.2.1.    | Polypeptide N-acetylgalactosaminyl transferase deficiency                                   |      | 601756 |
| S           | GALTNT3 deficiency                                                                          |      | 601756 |
| 9.2.3.      | O-xylosyl/N-acetylgalactosaminylglycan synthesis deficiencies                               |      |        |
| 9.2.3.1.    | SLC35D1 deficiency                                                                          |      | 610804 |
| 9.2.4.      | O-mannosylglycan synthesis deficiencies                                                     |      |        |
| 9.2.4.1.    | Protein-O-mannosyltransferase 1 deficiency                                                  |      | 607423 |
| S           | POMT1 deficiency                                                                            |      | 607423 |
| 9.2.4.2.    | Protein-O-mannosyltransferase 2 deficiency                                                  |      | 607423 |
| S           | POMT1 deficiency                                                                            |      | 607423 |
| 9.2.4.3.    | Protein-O-mannose beta-1,2-N-acetylglucosaminyltransferase deficiency                       | E744 | 606822 |
| S           | POMGNT1 deficiency                                                                          | E744 | 606822 |
| 9.2.4.4.    | Fukutin deficiency                                                                          | E744 | 607440 |
| S           | FKTN deficiency                                                                             |      | 607440 |
| 9.2.4.5.    | Fukutin-related protein deficiency                                                          |      | 606596 |
| S           | FGRP deficiency                                                                             | E744 | 606596 |
| 9.2.4.6.    | N-acetylglucosaminyltransferase-like protein deficiency                                     |      | 603590 |
| S           | LARGE deficiency                                                                            |      | 603590 |
| 9.2.4.7.    | O-fucose-specific beta-1,3-N-acetylglucosaminyltransferase deficiency                       |      | 602576 |
| S           | SCDO3 deficiency                                                                            |      | 602576 |
| 9.2.4.8.    | O-fucose-specific beta-1,3-N-glycosyltransferase deficiency                                 |      | 610308 |
| S           | B3GALTL deficiency                                                                          |      | 610308 |
| <b>9.3.</b> | <b>Disorders of glycosphingolipid and glycosylphosphatidylinositol anchor glycosylation</b> |      |        |
| 9.3.1.1.    | Lactosylceramide alpha-2,3-sialyltransferase deficiency                                     |      | 609056 |
| S           | SIAT9 deficiency                                                                            |      | 609056 |
| 9.3.1.2.    | Phosphatidylinositolglycan, class M deficiency                                              |      | 610273 |
| S           | PIGM deficiency                                                                             |      | 610273 |
| <b>9.4.</b> | <b>Disorders of multiple glycosylation and other glycosylation pathways</b>                 |      |        |
| 9.4.1.      | GDP-Man:Dol-P mannosyltransferase deficiency                                                |      | 603503 |
| S           | DPM1-CDG                                                                                    |      | 603503 |
| S           | CDG-Ie                                                                                      |      | 603503 |
| 9.4.2.      | Lec35 deficiency                                                                            |      | 608799 |
| S           | MPDU1-CDG                                                                                   |      | 608799 |
| S           | CDG-If                                                                                      |      | 608799 |
| 9.4.3.      | Beta-1,4-galactosyltransferase 1 deficiency                                                 |      | 607091 |
| S           | B4GALT1-CDG                                                                                 |      | 607091 |
| S           | CDG-IId                                                                                     |      | 607091 |
| 9.4.4.      | UDP-GlcNAc epimerase/kinase deficiency                                                      |      | 600737 |
| S           | GNE-CDG                                                                                     |      | 600737 |
| 9.4.5.      | CMP-sialic acid transporter deficiency                                                      |      | 605634 |
| S           | SLC35A1-CDG                                                                                 |      | 605634 |

|                                                     |                                                             |       |        |
|-----------------------------------------------------|-------------------------------------------------------------|-------|--------|
| S                                                   | CDG-IIf                                                     |       | 605634 |
| 9.4.6.                                              | GDP-fucose transporter deficiency                           |       | 605881 |
| S                                                   | SLC35C1-CDG                                                 |       | 605881 |
| S                                                   | CDG-IIc                                                     |       | 605881 |
| 9.4.7.                                              | Dolichol pathway deficiencies                               |       |        |
| 9.4.7.1.                                            | Dolichol kinase deficiency                                  |       | 610768 |
| S                                                   | DK1-CDG                                                     |       | 610768 |
| S                                                   | CDG-Im                                                      |       | 610768 |
| 9.4.8.                                              | Conserved oligomeric Golgi (COG) complex deficiency         |       |        |
| 9.4.8.1.                                            | Component of COG complex 7 deficiency                       |       | 606978 |
| S                                                   | CDG-IIf                                                     |       | 606978 |
| 9.4.8.2.                                            | Component of COG complex 1 deficiency                       |       | 606973 |
| S                                                   | CDG-IIg                                                     |       | 606973 |
| 9.4.8.3.                                            | Component of COG complex 8 deficiency                       |       | 606979 |
| 9.4.9.                                              | V-ATPase deficiencies                                       |       |        |
| 9.4.9.1.                                            | V0 subunit A2 of vesicular H(+)-ATPase deficiency           |       | 611716 |
| S                                                   | ATP6VOA2-CDG                                                |       | 611716 |
| S                                                   | COPII component SEC23B                                      |       | 610512 |
| S                                                   | SEC23B-CDG(CDAII)                                           |       | 610512 |
| <b>9.5. Disorders of protein ubiquitinylation</b>   |                                                             |       |        |
| <b>9.6. Other disorders of protein modification</b> |                                                             |       |        |
| <b>10. Lysosomal disorders</b>                      |                                                             |       |        |
| <b>10.1. Mucopolysaccharidoses</b>                  |                                                             |       | E76.   |
| 10.1.1.                                             | MPS I, Hurler, Scheie disease                               | E76.0 | 252800 |
| S                                                   | Alpha-iduronidase deficiency                                |       |        |
| 10.1.2.                                             | MPS II, Hunter disease                                      | E76.1 | 309900 |
| S                                                   | Iduronate 2-sulphatase deficiency                           |       |        |
| 10.1.3.                                             | MPS IIIA, Sanfilippo A disease                              | E76.2 | 252900 |
| S                                                   | Heparan - N - sulphatase deficiency                         |       |        |
| 10.1.4.                                             | MPS IIIB, Sanfilippo B disease                              | E76.2 | 252920 |
| S                                                   | N-acetyl-alpha-D-glucosaminidase deficiency                 |       |        |
| 10.1.5.                                             | MPS IIIC, Sanfilippo C disease                              | E76.2 | 252930 |
| S                                                   | Acetyl-CoA alpha-glucosaminide acetyltransferase deficiency |       |        |
| 10.1.6.                                             | MPS IIID, Sanfilippo D disease                              | E76.2 | 252940 |
| S                                                   | N-acetylglucosamine-6-sulphatase deficiency                 |       |        |
| 10.1.7.                                             | MPS IVA, Morquio A disease                                  | E76.2 | 253000 |
| S                                                   | N-acetylgalactosamine-6-sulphatase deficiency               |       |        |
| 10.1.8.                                             | MPS IVB, Morquio B disease                                  | E76.2 | 253010 |
| S                                                   | Beta-galactosidase deficiency                               |       |        |
| 10.1.9.                                             | MPS VI, Maroteaux - Lamy disease                            | E76.2 | 253200 |
| S                                                   | N-acetylgalactosamine - 4 - sulphatase deficiency           |       |        |
| S                                                   | Arylsulphatase B deficiency                                 |       |        |
| 10.1.10.                                            | MPS VII, Sly disease                                        | E76.2 | 253220 |
| S                                                   | Beta-glucuronidase deficiency                               |       |        |
| 10.1.11.                                            | MPS IX                                                      | E76.2 | 601492 |
| S                                                   | Hyaluronidase deficiency                                    |       |        |
| <b>10.2. Oligosaccharidoses</b>                     |                                                             |       | E77.0  |
| 10.2.1.                                             | Aspartylglucosaminuria                                      | E77.1 | 208400 |
| S                                                   | Aspartylglucosaminidase deficiency                          |       |        |
| 10.2.2.                                             | Fucosidosis                                                 | E77.1 | 230000 |
| S                                                   | Alpha-fucosidase deficiency                                 |       |        |
| 10.2.3.                                             | Alpha - D – mannosidosis                                    | E77.1 | 248500 |
| S                                                   | Alpha-mannosidase deficiency                                |       |        |
| 10.2.4.                                             | Beta - D – mannosidosis                                     | E77.1 | 248510 |



|                                                            |       |        |
|------------------------------------------------------------|-------|--------|
| S Beta-mannosidase deficiency                              |       |        |
| 10.2.5. Schindler disease                                  | E77.1 | 104170 |
| S Alpha-N-acetylgalactosaminidase deficiency               |       |        |
| 10.2.5.1. Schindler disease type I                         | E77.1 | 104170 |
| 10.2.5.2. Kanzaki disease                                  | E77.1 | 104170 |
| S Schindler disease type II                                |       |        |
| 10.2.6. Sialidosis                                         | E77.1 | 256550 |
| S Alpha-neuraminidase                                      |       |        |
| <b>10.3. Sphingolipidoses</b>                              | E75.0 |        |
| 10.3.1. GM1-gangliosidosis                                 | E75.1 | 230500 |
| S Beta-galactosidase deficiency                            |       |        |
| 10.3.2. GM2-gangliosidosis                                 | E75.0 | 268800 |
| 10.3.2.1. GM2-gangliosidosis O-variant,                    | E75.0 | 268800 |
| S Sandhoff disease                                         |       |        |
| S Total hexosaminidase deficiency                          |       |        |
| 10.3.2.2. GM2-gangliosidosis B-variant                     | E75.0 | 272800 |
| S Tay-Sachs disease                                        |       |        |
| S Hexosaminidase A deficiency                              |       |        |
| 10.3.2.3. GM2-gangliosidosis AB-variant                    | E75.0 | 272750 |
| S GM2 activator deficiency                                 |       |        |
| 10.3.3. Gaucher disease                                    | E75.2 | 230800 |
| S Glucocerebrosidase deficiency                            |       |        |
| 10.3.4. Krabbe disease                                     | E75.2 | 245200 |
| S Galactocerebrosidase deficiency                          |       |        |
| 10.3.5. Metachromatic leukodystrophy                       |       | 250100 |
| S Arylsulphatase A deficiency                              | E75.2 |        |
| 10.3.6. Saposin deficiency                                 | E75.2 | 176801 |
| 10.3.6.1. Saposin A deficiency                             | E75.2 | 611722 |
| S Krabbe disease due to Saposin A deficiency               | E75.2 |        |
| 10.3.6.2. Saposin B deficiency                             | E75.2 | 249900 |
| S Metachromatic leukodystrophy due to Saposin B deficiency | E75.2 |        |
| 10.3.6.3. Saposin C deficiency                             | E75.2 | 610539 |
| S Gaucher disease due to Saposin C deficiency              | E75.2 |        |
| 10.3.6.4. Saposin D deficiency                             |       |        |
| 10.3.7. Fabry disease                                      | E75.2 | 301500 |
| S Alpha-galactosidase deficiency                           |       |        |
| 10.3.8. Farber disease                                     | E75.2 | 228000 |
| S Ceramidase deficiency                                    |       |        |
| 10.3.9. Niemann-Pick disease type A or B                   | E75.2 | 257200 |
| S Sphingomyelinase deficiency                              |       |        |
| 10.3.10. Niemann-Pick disease type C                       | E75.2 | 257220 |
| 10.3.10.1. Niemann-Pick disease type C1                    | E75.2 | 257220 |
| 10.3.10.2. Niemann-Pick disease type C2                    | E75.2 | 607625 |
| <b>10.4. Ceroid lipofuscinoses, neuronal (CLN)</b>         |       |        |
| 10.4.1. CLN1, Santavuori-Haltia disease                    | E75.4 | 256730 |
| S Lysosomal palmitoyl protein thioesterase-1 deficiency    | E75.4 |        |
| 10.4.2. CLN2, Jansky-Bielschowsky disease                  | E75.4 | 204500 |
| S Lysosomal tripeptidyl-peptidase-1 deficiency             | E75.4 |        |
| 10.4.3. CLN3, Batten Spielmeier-Vogt disease               | E75.4 | 204200 |
| S Lysosomal transmembrane CLN3 protein deficiency          | E75.4 |        |
| 10.4.4. CLN4A, Kufs disease recessive type                 | E75.4 | 204300 |
| 10.4.5. CLN4B Kufs disease dominant type                   | E75.4 | 162350 |
| 10.4.6. CLN5 Finnish variant                               | E75.4 | 256731 |
| S Lysosomal transmembrane CLN5 protein deficiency          | E75.4 |        |
| 10.4.7. CLN6                                               | E75.4 | 601780 |

|                                                                     |       |        |
|---------------------------------------------------------------------|-------|--------|
| 10.4.8. CLN7                                                        | E75.4 | 610950 |
| S CLN Turkish variant                                               | E75.4 |        |
| 10.4.9. CLN8, Northern epilepsy type                                | E75.4 | 600143 |
| 10.4.10. CLN9                                                       | E75.4 | 609055 |
| 10.4.11. CLN10                                                      | E75.4 | 610127 |
| S Cathepsin D deficiency                                            | E75.4 |        |
| <b>10.5. Lysosomal export disorders</b>                             |       |        |
| 10.5.1. Cystinosis                                                  | E72.0 | 219800 |
| S Cystinosis deficiency                                             |       |        |
| 10.5.2. Salla disease/infantile sialic acid storage disease         |       | 269920 |
| S Solute carrier family 17 member 5 (SLC17A5) deficiency            |       |        |
| <b>10.6. Other lysosomal disorders</b>                              |       |        |
| 10.6.1. Mucopolidosis II, I-cell disease                            | E77.0 | 252500 |
| S N-acetylglucosamine-1-phosphotransferase (alpha/beta) deficiency  |       |        |
| 10.6.2. Mucopolidosis III, Pseudo-Hurler polydystrophy              | E77.0 | 252605 |
| S N-acetylglucosamine-1-phosphotransferase (gamma) deficiency       |       |        |
| 10.6.3. Mucopolidosis IV                                            | E75.1 | 252650 |
| S Mucolin-1 deficiency                                              |       |        |
| 10.6.4. Multiple sulphatase deficiency                              | E76.2 | 272200 |
| S Sulphatase-modifying factor 1 (SUMF-1) deficiency                 |       |        |
| 10.6.5. Wolman/cholesterol ester storage disease                    | E75.5 | 278000 |
| S Acid lipase deficiency                                            |       |        |
| 10.6.6. Pompe disease, GSD type II                                  | E74.0 | 232300 |
| S Acid alpha-1,4-glucosidase deficiency                             |       |        |
| 10.6.7. Sialuria                                                    |       | 269921 |
| S UDP-N-acetylglucosamine 2-epimerase deficiency                    |       |        |
| 10.6.8. Danon disease                                               |       | 300257 |
| S Lysosomal-associated membrane protein-2 (LAMP2) deficiency        |       |        |
| 10.6.9. Cathepsin-related disorders                                 |       | 265800 |
| 10.6.9.1. Galactosialidosis                                         | E77.1 | 256540 |
| S Lysosomal protective protein deficiency                           |       |        |
| S Cathepsin A deficiency                                            |       |        |
| 10.6.9.2. Papillon-Lefèvre syndrome                                 |       | 245000 |
| S Cathepsin C deficiency                                            |       |        |
| 10.6.9.3. Pycnodysostosis                                           |       | 265800 |
| S Cathepsin K deficiency                                            |       |        |
| 10.6.10. Hermansky-Pudlak Syndrome                                  | E70.3 | 203300 |
| <b>11. Peroxisomal disorders</b>                                    |       |        |
| <b>11.1. Disorders of peroxisome biogenesis</b>                     |       |        |
| S Zellweger spectrum disorder                                       |       | 214100 |
| S Hyperpipecolic acidaemia                                          |       | 239400 |
| 11.1.1. Zellweger spectrum disorder, severe form                    |       | 214100 |
| S Zellweger syndrome                                                |       | 214100 |
| 11.1.2. Zellweger spectrum disorder, attenuated form                |       | 214100 |
| 11.1.2.1. Neonatal adrenoleukodystrophy                             |       | 202370 |
| 11.1.2.2. Infantile Refsum disease                                  |       | 266510 |
| 11.1.3. Zellweger spectrum disorder, unclassified clinical severity |       | 214100 |
| 11.1.3.1. PEX1 deficiency                                           |       | 602136 |
| 11.1.3.2. PEX2 deficiency                                           |       | 170993 |
| 11.1.3.3. PEX3 deficiency                                           |       | 603164 |
| 11.1.3.4. PEX5 deficiency                                           |       | 600414 |
| 11.1.3.5. PEX6 deficiency                                           |       | 601498 |

|                                                                                |                                                                  |      |        |
|--------------------------------------------------------------------------------|------------------------------------------------------------------|------|--------|
| 11.1.3.6.                                                                      | PEX10 deficiency                                                 |      | 602859 |
| 11.1.3.7.                                                                      | PEX12 deficiency                                                 |      | 601758 |
| 11.1.3.8.                                                                      | PEX13 deficiency                                                 |      | 601789 |
| 11.1.3.9.                                                                      | PEX14 deficiency                                                 |      | 601791 |
| 11.1.3.10.                                                                     | PEX16 deficiency                                                 |      | 603360 |
| 11.1.3.11.                                                                     | PEX19 deficiency                                                 |      | 600279 |
| 11.1.3.12.                                                                     | PEX26 deficiency                                                 |      | 608666 |
| <b>11.2. Rhizomelic chondrodysplasia punctate</b>                              |                                                                  |      |        |
| 11.2.1.                                                                        | Rhizomelic chondrodysplasia punctata type 1                      |      | 215100 |
|                                                                                | S PTS2 receptor deficiency                                       |      |        |
|                                                                                | S PEX7 deficiency                                                |      | 601757 |
| 11.2.2.                                                                        | Rhizomelic chondrodysplasia punctata type 2                      |      | 222765 |
|                                                                                | S Isolated dihydroxyacetone phosphate acyltransferase deficiency |      |        |
| 11.2.3.                                                                        | Rhizomelic chondrodysplasia punctata type 3                      |      | 600121 |
|                                                                                | S Isolated alkyl-dihydroxyacetone phosphate synthase deficiency  |      |        |
| <b>11.3. Disorders of peroxisomal alpha-, beta and omega-oxidation</b>         |                                                                  |      |        |
| 11.3.1.                                                                        | X-linked adrenoleukodystrophy                                    |      | 300100 |
|                                                                                | S Schilder disease                                               |      |        |
|                                                                                | S ALD                                                            |      |        |
| 11.3.2.                                                                        | Peroxisomal acyl-CoA oxidase 1 deficiency                        |      | 264470 |
| 11.3.3.                                                                        | Peroxisomal D-bifunctional protein deficiency                    |      | 261515 |
|                                                                                | S DBP deficiency                                                 |      |        |
| 11.3.4.                                                                        | Sterol carrier protein deficiency                                |      |        |
|                                                                                | S SCPx deficiency                                                |      |        |
| 11.3.5.                                                                        | Alpha-methylacyl-CoA racemase deficiency                         |      | 604489 |
|                                                                                | S AMACR deficiency                                               |      |        |
| 11.3.6.                                                                        | Refsum disease                                                   |      | 266500 |
|                                                                                | S Phytanoyl-CoA hydroxylase deficiency                           |      |        |
| <b>11.4. Other peroxisomal disorders</b>                                       |                                                                  |      |        |
| 11.4.1.                                                                        | Primary hyperoxaluria type I                                     |      | 259900 |
|                                                                                | S Alanine:glyoxylate aminotransferase deficiency                 |      |        |
| 11.4.2.                                                                        | Acatalasaemia                                                    |      | 115500 |
|                                                                                | S Catalase deficiency                                            |      |        |
| <b>12. Disorders of neurotransmitter metabolism</b>                            |                                                                  |      |        |
| <b>12.1. Disorders in the metabolism of biogenic amines</b>                    |                                                                  |      |        |
| 12.1.1.                                                                        | Tyrosine hydroxylase deficiency                                  |      | 191290 |
| 12.1.2.                                                                        | Aromatic L-amino acid decarboxylase deficiency                   | E728 | 608643 |
| 12.1.3.                                                                        | Dopamine beta-hydroxylase deficiency                             | E250 | 223360 |
| <b>12.2. Disorders in the metabolism of gamma-aminobutyrate</b>                |                                                                  |      |        |
| 12.2.1.                                                                        | Succinic semialdehyde dehydrogenase deficiency                   | E722 | 271980 |
|                                                                                | S 4-Hydroxybutyric aciduria                                      |      |        |
| 12.2.2.                                                                        | GABA transaminase deficiency                                     | E728 | 137150 |
| <b>12.3. Other disorders of neurotransmitter metabolism</b>                    |                                                                  |      |        |
| <b>13. Disorders in the metabolism of vitamins and (non-protein) cofactors</b> |                                                                  |      |        |
| <b>13.1. Disorders of folate metabolism and transport</b>                      |                                                                  |      |        |
| 13.1.1.                                                                        | Hereditary folate malabsorption                                  | E538 | 229050 |
|                                                                                | S SLC 46A1 deficiency                                            |      |        |
|                                                                                | S Proton-coupled folate transporter (PCFT) deficiency            |      |        |
| 13.1.2.                                                                        | Cerebral folate deficiency due to FOLR1 deficiency               | -    | 613068 |
|                                                                                | S Neurodegeneration due to cerebral folate transport deficiency  | -    |        |
| 13.1.3.                                                                        | Methylenetetrahydrofolate reductase deficiency                   | E711 | 236250 |
|                                                                                | S MTHFR deficiency                                               |      |        |
|                                                                                | S Homocystinuria due to deficiency of N(5,10)-                   |      |        |

|                                                                                                              |      |        |
|--------------------------------------------------------------------------------------------------------------|------|--------|
| methylenetetrahydrofolate reductase activity                                                                 |      |        |
| 13.1.4. Other genetic disorders in folate transport and metabolism                                           | D528 | -      |
| 13.1.5. Unspecified disorders of folate transport and metabolism                                             | D528 | -      |
| 13.1.6. Secondary disorders of folate transport and metabolism                                               | D529 | -      |
| 13.1.7. Cerebral folate deficiency due to autoantibodies-non-genetic                                         | -    | -      |
| <b>13.2. Disorders of cobalamin absorption, transport and metabolism</b>                                     |      |        |
| 13.2.1. Intrinsic factor deficiency                                                                          | D510 | 609342 |
| S IFD                                                                                                        |      |        |
| S Transcobalamin III deficiency                                                                              |      |        |
| S TCN III, TCN3 deficiency                                                                                   |      |        |
| 13.2.2. Enterocyte intrinsic factor receptor deficiency                                                      | D511 | 261100 |
| S Imerslund Gräsbeck syndrome                                                                                |      |        |
| S Selective malabsorption of cyanocobalamin                                                                  |      |        |
| S Intrinsic factor-cobalamin receptor deficiency                                                             |      |        |
| S IFCR deficiency                                                                                            |      |        |
| 13.2.2.1. Intrinsic factor receptor deficiency due to <i>CUBN</i> mutations                                  | D511 | 602997 |
| S Cubulin deficiency                                                                                         |      |        |
| 13.2.2.2. Intrinsic factor receptor deficiency due to <i>AMN</i> mutations                                   | D512 | 605799 |
| 13.2.3. Haptocorrin deficiency                                                                               |      |        |
| S Transcobalamin I deficiency                                                                                |      |        |
| S TCN 1 deficiency                                                                                           |      |        |
| S TC I, T1 deficiency                                                                                        | D512 | 189905 |
| S Vitamin B12-binding protein 1 deficiency                                                                   |      |        |
| S Cobalophilin deficiency                                                                                    |      |        |
| S B12-binding alpha-globulin deficiency                                                                      |      |        |
| 13.2.4. Transcobalamin II deficiency                                                                         |      |        |
| S TCN2 deficiency                                                                                            | D512 | 275350 |
| S TC II deficiency                                                                                           |      |        |
| S Vitamin B12-binding protein 2 deficiency                                                                   |      |        |
| 13.2.5. Defect in adenosylcobalamin synthesis-cbl A                                                          | E711 | 251100 |
| S Methylmalonic aciduria, cblA type                                                                          |      |        |
| S Methylmalonic acidemia, cblA type                                                                          |      |        |
| S Methylmalonic aciduria, vitamin B12-responsive, due to defect in synthesis of adenosylcobalamin, cblA type |      |        |
| 13.2.6. Defect in adenosylcobalamin synthesis-cbl B                                                          | E711 | 251110 |
| S Methylmalonic aciduria, cblB type                                                                          |      |        |
| S Methylmalonic acidemia, cblB type                                                                          |      |        |
| S Methylmalonic aciduria, vitamin B12-responsive, due to defect in synthesis of adenosylcobalamin, cblB type |      |        |
| 13.2.7. Defect in adenosylcobalamin synthesis-cblD-MMA                                                       | E728 | 277410 |
| 13.2.8. Defect in methylcobalamin synthesis-cblD-HC                                                          | E728 | 277410 |
| 13.2.9. Combined defect in adenosylcobalamin and methylcobalamin synthesis-cblC                              | E728 | 277400 |
| S Methylmalonic aciduria and homocystinuria, cblC type                                                       |      |        |
| S Methylmalonic acidemia and homocystinuria, cblC type                                                       |      |        |
| S Methylmalonic aciduria and homocystinuria, vitamin B12-responsive                                          |      |        |
| 13.2.10. Combined defect in adenosylcobalamin and methylcobalamin synthesis-cblD                             | E728 | 277410 |
| S Methylmalonic aciduria and homocystinuria, cblD type                                                       |      |        |
| 13.2.11. Combined defect in adenosylcobalamin and methylcobalamin synthesis-cblF                             | E728 | 277380 |
| S Methylmalonic aciduria and homocystinuria, cblF type                                                       |      |        |
| S Methylmalonic acidemia and homocystinuria, cblF type                                                       |      |        |
| S Lysosomal membrane cobalamin transporter deficiency                                                        |      |        |
| 13.2.12. Transcobalamin receptor (TCblR/CD320) defect                                                        |      | 606475 |

|                                                                                            |      |        |
|--------------------------------------------------------------------------------------------|------|--------|
| 13.2.13. Other genetic defect in cobalamin transport and metabolism                        | D518 | -      |
| 13.2.14. Unspecified disorder of cobalamin absorption, transport and metabolism            | D518 | -      |
| 13.2.15. Secondary non-genetic disorders of cobalamin absorption, transport and metabolism | D518 | -      |
| <b>13.3. Disorders of pterin metabolism</b>                                                | E701 |        |
| 13.3.1. Guanosine 5 triphosphate cyclohydrolase I deficiency                               | E701 | 233910 |
| 13.3.2. 6-Pyruvoyl-tetrahydropterin synthase deficiency                                    | E744 | 261640 |
| 13.3.3. Sepiapterin reductase deficiency                                                   | E701 | 612716 |
| 13.3.4. Quinoid dihydropteridine reductase deficiency                                      | E744 | 261630 |
| 13.3.5. Pterin 4 carbinolamine dehydratase deficiency                                      | E888 | 125310 |
| S Primapterinuria                                                                          | E888 | 125310 |
| <b>13.4. Disorders of vitamin D metabolism and transport</b>                               |      |        |
| <b>13.5. Disorders of biotin metabolism</b>                                                |      |        |
| 13.5.1. Biotinidase deficiency                                                             | D818 | 253260 |
| 13.5.2. Holocarboxylase synthetase deficiency                                              |      | 253270 |
| <b>13.6. Disorders of pyridoxine metabolism</b>                                            |      |        |
| 13.6.1. Pyridoxine-dependent seizures                                                      |      | 266100 |
| S Alpha-amino adipic semialdehyde (AASA) dehydrogenase deficiency                          |      |        |
| S Antiquitin (ALDH7A1) gene defect                                                         |      |        |
| 13.6.2. Pyridoxamine 5'-oxidase deficiency                                                 | E531 | 610090 |
| S Pyridoxal-phosphate dependent seizures                                                   | E531 | 610090 |
| <b>13.7. Disorders of thiamine metabolism</b>                                              |      |        |
| 13.7.1. Thiamine-responsive megaloblastic anemia syndrome                                  | E519 | 249270 |
| S THTR1 deficiency (SLC19A2)                                                               | E519 | 249270 |
| 13.7.2. Biotin-responsive basal ganglia disease                                            |      | 607483 |
| S THTR2 deficiency (SLC19A3)                                                               |      | 607483 |
| 13.7.3. Microcephaly, Amish type                                                           |      | 607196 |
| S Mitochondrial thiamine pyrophosphate carrier deficiency (SLC25A19)                       |      | 606521 |
| <b>13.8. Disorders of molybdenum cofactor metabolism</b>                                   |      |        |
| 13.8.1. Molybdenum cofactor deficiency                                                     | E798 | 252150 |
| 13.8.1.1. Mo cofactor deficiency, complementation group A                                  | E798 | 603707 |
| S MOCS1 deficiency                                                                         | E798 | 603707 |
| 13.8.1.2. Mo cofactor deficiency, complementation group B                                  | E798 | 603708 |
| S MOCS2 deficiency                                                                         | E798 | 603708 |
| 13.8.1.3. Mo cofactor deficiency, complementation group C                                  | E798 | 603930 |
| S GPHN (gephyrin) deficiency                                                               | E798 | 603930 |
| <b>13.9. Other disorders of vitamins and cofactors</b>                                     |      |        |
| 13.9.1. TTP1 deficiency                                                                    | E560 | 277460 |
| S Familial isolated Vitamin E deficiency                                                   | E560 | 277460 |
| 13.9.2. Vitamin K epoxide reductase deficiency                                             | E561 | 607473 |
| 13.9.3. Retinol binding protein deficiency                                                 | E509 | 180250 |
| 13.9.4. Pantothenate kinases deficiency                                                    | E568 | 234200 |
| S Neurodegeneration with brain iron accumulation 1                                         | E568 | 234200 |
| S Hallervorden-Spatz disease                                                               | E568 | 234200 |
| <b>14. Disorders in the metabolism of trace elements and metals</b>                        |      |        |
| <b>14.1. Disorder of copper metabolism</b>                                                 | E830 |        |
| 14.1.1. Menkes syndrome                                                                    | E830 | 309400 |
| 14.1.2. Occipital horn syndrome                                                            | Q796 | 304150 |
| 14.1.3. Wilson disease                                                                     | E830 | 277900 |
| <b>14.2. Disorder of iron metabolism</b>                                                   | E831 |        |
| 14.2.1. Hereditary haemochromatosis                                                        |      |        |

|                                                                               |      |        |
|-------------------------------------------------------------------------------|------|--------|
| 14.2.1.1. Hereditary haemochromatosis Type 1                                  | E831 | 235200 |
| 14.2.1.2. Hereditary haemochromatosis Type 2                                  | E831 | 235200 |
| 14.2.1.3. Hereditary haemochromatosis Type 3                                  | E831 | 235200 |
| 14.2.1.4. Hereditary haemochromatosis Type 4                                  | E831 | 235200 |
| 14.2.2. Neonatal haemochromatosis                                             | E831 |        |
| 14.2.3. Haemosiderosis, acquired                                              | E831 |        |
| <b>14.3. Disorder of zinc metabolism</b>                                      | E832 |        |
| 14.3.1. Acrodermatitis enteropathica                                          | E832 | 201100 |
| 14.3.2. Hyperzincemia and hypercalprotectinemia                               | E832 | 194470 |
| <b>14.4. Disorder of phosphate, calcium and vitamin D metabolism</b>          | E835 |        |
| <b>14.5. Disorder of magnesium metabolism</b>                                 | E834 |        |
| 14.5.1. Hypermagnesaemia                                                      | E834 |        |
| 14.5.2. Hypomagnesaemia                                                       | E834 |        |
| 14.5.3. Primary hypomagnesaemia                                               | E834 |        |
| 14.5.3.1. Isolated familial renal hypomagnesaemia                             | E834 |        |
| 14.5.3.2. Familial hypokalaemia – hypomagnesaemia                             | E876 |        |
| 14.5.3.3. Familial hypomagnesaemia – hypercalciuria                           | E888 |        |
| 14.5.3.4. Isolated familial intestinal hypomagnesaemia                        | E834 |        |
| 14.5.4. Secondary hypomagnesaemia                                             | E834 |        |
| 14.5.4.1. Neonatal hypomagnesaemia                                            | P712 | 307600 |
| 14.5.4.2. Hypomagnesaemic tetany in newborn                                   | P713 |        |
| 14.5.4.3. Drug induced hypomagnesaemia                                        | E834 |        |
| 14.5.5. Hypomagnesaemic tetany                                                | E834 |        |
| <b>14.6. Disorders in the metabolism of other trace elements and metals</b>   |      |        |
| <b>15. Disorders and variants in the metabolism of xenobiotics</b>            |      |        |
| <b>15.1. Disorders and variants of cytochrome P450-mediated oxidation</b>     |      |        |
| <b>15.2. Disorders and variants of other enzymes that oxidise xenobiotics</b> |      |        |
| 15.2.1. Trimethylaminuria                                                     | E888 | 602079 |
| <b>15.3. Disorders and variants of xenobiotics conjugation</b>                |      |        |
| <b>15.4. Disorders and variants of xenobiotics transport</b>                  |      |        |
